# Supplementary material for: Phylogenetic Analysis of Spliceosome SF3a2 in Different Plant Species
Source: MDPI journal article supplement (doi:10.3390/ijms24065232), 2023-03-09
Supplement: s1 [file s1]

Supplementary Table S1 Sequence summary on phylogenetic analysis.

| Plant species                     | Common name             | No. of | Sequence initial e.g.                                                                                |
|-----------------------------------|-------------------------|--------|------------------------------------------------------------------------------------------------------|
| <i>Amaranthus hypochondriacus</i> | Prince-of-Wales feather | 2      | <i>AHYPO_001149-RA</i> ( <b>AhySYF3A2a</b> )<br><i>AHYPO_000598-RA</i> ( <b>AhySYF3A2b</b> )         |
| <i>Ananas comosus</i>             | Pineapple               | 1      | <i>Aco024234.1</i> ( <b>AncoSYF3A2</b> )                                                             |
| <i>Aquilegia coerulea</i>         | Colorado blue columbine | 1      | <i>Aqcoe2G212900.1.p</i> ( <b>AqcoSYF3A2</b> )                                                       |
| <i>Arabidopsis halleri</i>        |                         | 2      | <i>Araha.1971s0014.1.p</i> ( <b>AhaSYF3A2a</b> )<br><i>Araha.1905s0002.1.p</i> ( <b>AhaSYF3A2b</b> ) |
| <i>Arabidopsis lyrata</i>         | Arabidopsis             | 1      | <i>AL4G28000.t1</i> ( <b>AlySYF3A2</b> )                                                             |
| <i>Arabidopsis thaliana</i>       | Arabidopsis             | 1      | <i>AT2G32600.1</i> ( <b>AthSYF3A2</b> )                                                              |
| <i>Brachypodium distachyon</i>    | Purple false brome      | 1      | <i>Bradi1g67320.1.p</i> ( <b>BdiSYF3A2</b> )                                                         |
| <i>Brachypodium stacei</i>        |                         | 1      | <i>Brast02G124800.1.p</i> ( <b>BstSYF3A2</b> )                                                       |
| <i>Brassica oleracea capitata</i> | Cabbage                 | 1      | <i>Bol013469</i> ( <b>BolSYF3A2</b> )                                                                |
| <i>Boechera stricta</i>           |                         | 1      | <i>Bostr.23794s0853</i> ( <b>BstSYF3A2</b> )                                                         |
| <i>Brassica rapa</i>              |                         | 1      | <i>Brara.E01157.1.p</i> ( <b>BraSYF3A2</b> )                                                         |
| <i>Capsella grandiflora</i>       |                         | 2      | <i>Cagra.0804s0006.1.p</i> ( <b>CgrSYF3A2a</b> )<br><i>Cagra.4714s0005.1.p</i> ( <b>CgrSYF3A2b</b> ) |
| <i>Capsella rubella</i>           | Pink shepherd's-purse   | 2      | <i>Carubv10007569m</i> ( <b>CruSYF3A2a</b> )<br><i>Carubv10023821m</i> ( <b>CruSYF3A2b</b> )         |
| <i>Chenopodium quinoa</i>         | Quinoa                  | 1      | <i>AUR62026953-RA</i> ( <b>CquSYF3A2</b> )                                                           |
| <i>Chlamydomonas reinhardtii</i>  |                         | 1      | <i>Cre06.g252700.t1.2</i> ( <b>CreSYF3A2</b> )                                                       |
| <i>Coccomyxa subellipsoidea</i>   |                         | 1      | <i>53193</i> ( <b>CsuSYF3A2</b> )                                                                    |
| <i>Cucumis sativus</i>            | Cucumber                | 1      | <i>Cucsa.306500.1</i> ( <b>CsaSYF3A2</b> )                                                           |
| <i>Daucus carota</i>              |                         | 1      | <i>DCAR_020804</i> ( <b>DcaSYF3A2</b> )                                                              |
| <i>Dunaliella salina</i>          |                         | 1      | <i>Dusal.0694s00005.1.p</i> ( <b>DsaSYF3A2</b> )                                                     |
| <i>Eucalyptus grandis</i>         | Flooded gum             | 1      | <i>Eucgr.K02436.1.p</i> ( <b>EgrSYF3A2</b> )                                                         |
| <i>Eutrema</i>                    |                         | 1      | <i>Thhalv10017051m</i> ( <b>EsaSYF3A2</b> )                                                          |

|                                    |                   |   |                                                                                                                                                                                                              |
|------------------------------------|-------------------|---|--------------------------------------------------------------------------------------------------------------------------------------------------------------------------------------------------------------|
| <i>salsugineum</i>                 |                   |   |                                                                                                                                                                                                              |
| <i>Fragaria vesca</i>              | Wild strawberry   | 1 | <i>mrna09805.1-v1.0-hybrid</i> ( <b>FveSYF3A2</b> )                                                                                                                                                          |
| <i>Glycine max</i>                 | Soybean           | 2 | <i>Glyma.15G005900.1.p</i> ( <b>GmaSYF3A2a</b> )<br><i>Glyma.13G367400.1.p</i> ( <b>GmaSYF3A2b</b> )                                                                                                         |
| <i>Gossypium hirsutum</i>          | Upland cotton     | 2 | <i>Gohir.D09G140400.1.p</i> ( <b>GhiSYF3A2a</b> )<br><i>Gohir.A09G144600.1.p</i> ( <b>GhiSYF3A2b</b> )                                                                                                       |
| <i>Gossypium raimondii</i>         | Cotton            | 1 | <i>Gorai.006G161000.1</i> ( <b>GraSYF3A2</b> )                                                                                                                                                               |
| <i>Kalanchoe fedtschenkoi</i>      |                   | 2 | <i>Kaladp0098s0047.1.p</i> ( <b>KfeSYF3A2a</b> )<br><i>Kaladp0011s0266.1.p</i> ( <b>KfeSYF3A2b</b> )                                                                                                         |
| <i>Kalanchoe laxiflora</i>         |                   | 4 | <i>Kalax.1083s0001.1.p</i> ( <b>KlaSYF3A2a</b> )<br><i>Kalax.0420s0030.1.p</i> ( <b>KlaSYF3A2b</b> )<br><i>Kalax.0178s0076.1.p</i> ( <b>KlaSYF3A2c</b> )<br><i>Kalax.0186s0022.1.p</i> ( <b>KlaSYF3A2d</b> ) |
| <i>Linum usitatissimum</i>         | Flax              | 1 | <i>Lus10022607</i> ( <b>LusSYF3A2</b> )                                                                                                                                                                      |
| <i>Malus domestica</i>             | Apple             | 2 | <i>MDP0000286077</i> ( <b>MdoSYF3A2a</b> )<br><i>MDP0000534942</i> ( <b>MdoSYF3A2b</b> )                                                                                                                     |
| <i>Manihot esculenta</i>           | Cassava           | 1 | <i>Manes.09G061900.1.p</i> ( <b>MesSYF3A2</b> )                                                                                                                                                              |
| <i>Marchantia polymorpha</i>       | Common liverwort  | 1 | <i>Mapoly0069s0004.1.p</i> ( <b>MpoSYF3A2</b> )                                                                                                                                                              |
| <i>Medicago truncatula</i>         | Barrel medic      | 1 | <i>Medtr8g009970.1</i> ( <b>MtrSYF3A2</b> )                                                                                                                                                                  |
| <i>Micromonas pusilla</i> CCMP1545 |                   | 1 | 44451 ( <b>MpuSYF3A2</b> )                                                                                                                                                                                   |
| <i>Micromonas sp</i> RCC299        |                   | 1 | 63373 ( <b>MspSYF3A2</b> )                                                                                                                                                                                   |
| <i>Mimulus guttatus</i>            | Seep monkeyflower | 1 | <i>Migut.J00456.1.p</i> ( <b>MguSYF3A2</b> )                                                                                                                                                                 |
| <i>Oropetium thomaeum</i>          |                   | 1 | <i>Oropetium_20150105_00778A</i> ( <b>OthSYF3A2</b> )                                                                                                                                                        |
| <i>Oryza sativa</i>                | Rice              | 1 | <i>LOC_Os03g15700.1</i> ( <b>OsaSYF3A2</b> )                                                                                                                                                                 |
| <i>Ostreococcus lucimarinus</i>    | Green algae       | 1 | 13495 ( <b>OluSYF3A2</b> )                                                                                                                                                                                   |
| <i>Panicum hallii</i>              |                   | 1 | <i>Pahal.H02490.1</i> ( <b>PhaSYF3A2</b> )                                                                                                                                                                   |

|                                   |                 |   |                                                                                                                                                                |
|-----------------------------------|-----------------|---|----------------------------------------------------------------------------------------------------------------------------------------------------------------|
| <i>Panicum virgatum</i>           | Switchgrass     | 3 | <i>Pavir.9NG665400.1.p</i> ( <b>PviSYF3A2a</b> )<br><i>Pavir.9KG512300.1.p</i> ( <b>PviSYF3A2b</b> )<br><i>Pavir.9KG504400.1.p</i> ( <b>PviSYF3A2c</b> )       |
| <i>Phaseolus vulgaris</i>         | Common bean     | 1 | <i>Phvul.005G180000.1.p</i> ( <b>PvuSYF3A2</b> )                                                                                                               |
| <i>Physcomitrella patens</i>      | Moss            | 2 | <i>Pp3c9_13030V3.1.p</i> ( <b>PpaSYF3A2a</b> )<br><i>Pp3c15_8160V3.1.p</i> ( <b>PpaSYF3A2b</b> )                                                               |
| <i>Populus deltoides</i>          | Necklace poplar | 1 | <i>Podel.06G130900.1.p</i> ( <b>PdeSYF3A2</b> )                                                                                                                |
| <i>Populus trichocarpa</i>        | Cottonwood      | 2 | <i>Potri.006G121300.1</i> ( <b>PtrSYF3A2a</b> )<br><i>Potri.016G097600.1</i> ( <b>PtrSYF3A2b</b> )                                                             |
| <i>Prunus persica</i>             | Peach           | 2 | <i>Prupe.4G071900.1.p</i> ( <b>PpeSYF3A2a</b> )<br><i>Prupe.7G125300.1.p</i> ( <b>PpeSYF3A2b</b> )                                                             |
| <i>Ricinus communis</i>           |                 | 1 | <i>30078.m002249</i> ( <b>RcoSYF3A2</b> )                                                                                                                      |
| <i>Salix purpurea</i>             | Purple willow   | 1 | <i>SapurV1A.1059s0020.1.p</i> ( <b>SpuSYF3A2</b> )                                                                                                             |
| <i>Selaginella moellendorffii</i> | Spikemoss       | 1 | <i>180432</i> ( <b>SmoSYF3A2</b> )                                                                                                                             |
| <i>Setaria italica</i>            | Foxtail millet  | 1 | <i>Seita.9G455700.1.p</i> ( <b>SitSYF3A2</b> )                                                                                                                 |
| <i>Setaria viridis</i>            | Green foxtail   | 1 | <i>Sevir.9G459400.1.p</i> ( <b>SviSYF3A2</b> )                                                                                                                 |
| <i>Solanum lycopersicum</i>       | Tomato          | 1 | <i>Solyc09g008470.2.1</i> ( <b>SlySYF3A2</b> )                                                                                                                 |
| <i>Solanum tuberosum</i>          | Potato          | 1 | <i>PGSC0003DMP400006880</i> ( <b>StuSYF3A2</b> )                                                                                                               |
| <i>Sorghum bicolor</i>            | Sorghum         | 1 | <i>Sobic.001G428400.1.p</i> ( <b>SbiSYF3A2</b> )                                                                                                               |
| <i>Sphagnum fallax</i>            |                 | 2 | <i>Sphfalx0014s0238.1.p</i> ( <b>SfaSYF3A2a</b> )<br><i>Sphfalx0006s0301.1.p</i> ( <b>SfaSYF3A2b</b> )                                                         |
| <i>Theobroma cacao</i>            | Cacao tree      | 1 | <i>Thecc1EG022302t1</i> ( <b>TcaSYF3A2</b> )                                                                                                                   |
| <i>Trifolium pratense</i>         | Red clover      | 1 | <i>Tp57577_TGAC_v2_mRNA17966</i> ( <b>TprSYF3A2</b> )                                                                                                          |
| <i>Triticum aestivum</i>          | Common wheat    | 3 | <i>Traes_4DL_87F981684.1</i> ( <b>TaeSYF3A2a</b> )<br><i>Traes_4AS_74660DF99.1</i> ( <b>TaeSYF3A2b</b> )<br><i>Traes_4BL_3EA2CD6B0.1</i> ( <b>TaeSYF3A2c</b> ) |
| <i>Vitis vinifera</i>             | Grape           | 1 | <i>GSVIVT01033687001</i> ( <b>VviSYF3A2</b> )                                                                                                                  |
| <i>Volvox carteri</i>             |                 | 1 | <i>Vocar.0038s0046.1.p</i> ( <b>VcaSYF3A2</b> )                                                                                                                |
| <i>Zea mays</i>                   | Maize           | 4 | <i>Zm00008a035638_P01</i> ( <b>ZemaSYF3A2a</b> )<br><i>Zm00008a001017_P01</i> ( <b>ZemaSYF3A2b</b> )<br><i>GRMZM2G100620_P01</i> ( <b>ZemaSYF3A2c</b> )        |

|                       |                    |   |                                               |
|-----------------------|--------------------|---|-----------------------------------------------|
|                       |                    |   | <i>GRMZM2G307906_P01</i> <b>(ZemaSYF3A2d)</b> |
| <i>Zostera marina</i> | Common<br>eelgrass | 1 | <i>Zosma64g00720.1</i> <b>(ZomaSYF3A2)</b>    |

The species of plant lineage were listed and the number of 61 chosen was mentioned.

The species with bold character were selected for further analysis in Figure 1.
